# Supplementary material for: Impact of Nitrogen Removal in Wastewater Treatment on NDMA Formation at Downstream Drinking-Water Treatment Plants
Source: Atypon-hosted journal article supplement (doi:10.1061/(asce)ee.1943-7870.0001927), 2021-09-16
Supplement: supplemental_materials_ee.1943-7870.0001927_cadwallader.pdf [file supplemental_materials_ee.1943-7870.0001927_cadwallader.pdf]

## SUPPLEMENTAL MATERIALS

*ASCE Journal of Environmental Engineering*

# Impact of Nitrogen Removal in Wastewater Treatment on NDMA Formation at Downstream Drinking Water Treatment Plants

Adam Cadwallader, Jacelyn Rice-Boayue, and Jeanne M. VanBriesen

**DOI:** 10.1061/(ASCE)EE.1943-7870.0001927

© ASCE 2021

[www.ascelibrary.org](http://www.ascelibrary.org)

Table S1. System information for the 31 systems included in the high DFR system set

| <b>PWSID</b>                 | <b>Name</b>                               | <b>Plant Size</b> | <b>HUC 2<sup>1</sup></b> | <b>Source Water</b>      | <b>Disinfectant<sup>2</sup></b> |
|------------------------------|-------------------------------------------|-------------------|--------------------------|--------------------------|---------------------------------|
| AL0000933                    | ALBERTVILLE UTILITIES<br>BOARD            | L                 | 06                       | Lake Guntersville        | CL                              |
| AL0001084                    | DECATUR (MUNICIPAL<br>UTILITIES BOARD OF) | XL                | 06                       | Tennessee River          | CL                              |
| GA1210001                    | ATLANTA                                   | XL                | 03W                      | Chattahoochee River      | CL                              |
| GA2150000                    | COLUMBUS                                  | XL                | 03W                      | Chattahoochee River      | CL                              |
| <b>IA8222001<sup>3</sup></b> | <b>IOWA-AMERICAN WTR<br/>CO-DAVENPORT</b> | <b>XL</b>         | <b>07</b>                | <b>Mississippi River</b> | <b>CA</b>                       |
| IL0894070                    | AURORA                                    | XL                | 07                       | Fox River                | CA                              |
| IL0894380                    | ELGIN                                     | XL                | 07                       | Fox River                | CA                              |
| <b>IL1610450</b>             | <b>MOLINE</b>                             | <b>L</b>          | <b>07</b>                | <b>Mississippi River</b> | <b>CA</b>                       |
| <b>IL1610650</b>             | <b>ROCK ISLAND</b>                        | <b>L</b>          | <b>07</b>                | <b>Mississippi River</b> | <b>CA</b>                       |
| IN5202020                    | FORT WAYNE - 3 RIVERS<br>FILTRATION PLANT | XL                | 04                       | St. Joseph River         | CA                              |
| IN5282002                    | EVANSVILLE WATER<br>UTILITY               | XL                | 05                       | Ohio River               | CA                              |
| KY0110097                    | DANVILLE CITY WATER<br>WORKS              | VL                | 05                       | Herrington Lake          | CL                              |
| KY0370143                    | FRANKFORT PLANT<br>BOARD                  | VL                | 05                       | Kentucky River           | CA                              |
| KY0730533                    | PADUCAH WATER WORKS                       | VL                | 05                       | Ohio River               | CL                              |
| NC0229025                    | DAVIDSON WATER INC                        | XL                | 03N                      | Yadkin River             | CL                              |

|           |                                   |    |     |                      |       |
|-----------|-----------------------------------|----|-----|----------------------|-------|
| NC0343045 | HARNETT CO DEPT OF<br>PUBLIC UTIL | XL | 03N | Cape Fear River      | CA    |
| NC0392020 | CARY, TOWN OF                     | XL | 03N | Jordan Lake          | CA    |
| NJ1111001 | TRENTON WATER WORKS               | XL | 02  | Delaware River       | CL    |
| NJ1225001 | MIDDLESEX WATER<br>COMPANY        | XL | 02  | Delaware River       | CL    |
| NY0100205 | GUILDERLAND TOWN WD               | L  | 02  | Watervliet Reservoir | CL    |
| PA1090026 | LOWER BUCKS CO JOINT<br>MUN AUTH  | XL | 02  | Delaware River       | CL    |
| PA1460048 | NORTH WALES WATER<br>AUTHORITY    | VL | 02  | Delaware River       | CL    |
| PA5020043 | WEST VIEW BORO MUNI<br>AUTH       | XL | 05  | Ohio River           | CA/CL |
| PA5020056 | WILKINSBURG-PENN JT<br>WATER AUTH | XL | 05  | Allegheny River      | CA/CL |
| SC0720003 | BJW&SA (0720003)                  | VL | 03N | Savannah River       | CA    |
| TN0000107 | TENN-AMERICAN WATER<br>COMPANY    | XL | 06  | Tennessee River      | CL    |
| TN0000116 | CLARKSVILLE WATER<br>DEPARTMENT   | XL | 05  | Cumberland River     | CL    |
| TN0000286 | HARPETH VALLEY U D                | VL | 05  | Cumberland River     | CA    |
| TN0000366 | KNOXVILLE UTILITIES<br>BOARD-KUB  | XL | 06  | Tennessee River      | CL    |
| TX0140005 | CITY OF TEMPLE                    | VL | 12  | Leon River           | CL    |
| TX0700001 | CITY OF ENNIS                     | L  | 12  | Lake Bardwell        | CA    |

<sup>1</sup>2-digit hydrologic unit code

<sup>2</sup>Secondary disinfectant listed for UCMR 2 samples included in this study: CL = free chlorine, CA = chloramine, CL/CA = both free chlorine and chloramine were listed (in separate samples)

<sup>3</sup>Plants in bold had NDMA measurements consistently over 10 ng/L

Table S2. Contributing WWTP count for each high DFR DWTP by analysis distance

| <b>PWSID</b> | <b>Unconfined</b> | <b>50km</b> | <b>100km</b> | <b>150km</b> |
|--------------|-------------------|-------------|--------------|--------------|
| AL0000933    | 2                 | 2           | 2            | 2            |
| AL0001084    | 164               | 11          | 22           | 28           |
| GA1210001    | 11                | 4           | 6            | 11           |
| GA2150000    | 29                | 5           | 11           | 16           |
| IA8222001    | 767               | 23          | 54           | 108          |
| IL0894070    | 45                | 15          | 36           | 45           |
| IL0894380    | 37                | 22          | 34           | 37           |
| IL1610450    | 766               | 22          | 53           | 104          |
| IL1610650    | 766               | 22          | 53           | 107          |
| IN5202020    | 18                | 7           | 18           | 18           |
| IN5282002    | 1322              | 8           | 32           | 59           |
| KY0110097    | 5                 | 5           | 5            | 5            |
| KY0370143    | 30                | 3           | 18           | 24           |
| KY0730533    | 2032              | 9           | 30           | 73           |
| NC0229025    | 13                | 5           | 13           | 13           |
| NC0343045    | 25                | 7           | 20           | 25           |
| NC0392020    | 2                 | 2           | 2            | 2            |
| NJ1111001    | 96                | 6           | 41           | 62           |
| NJ1225001    | 24                | 24          | 24           | 24           |
| NY0100205    | 4                 | 4           | 4            | 4            |

|           |     |    |     |     |
|-----------|-----|----|-----|-----|
| PA1090026 | 105 | 15 | 45  | 70  |
| PA1460048 | 94  | 16 | 54  | 65  |
| PA5020043 | 310 | 65 | 161 | 252 |
| PA5020056 | 159 | 25 | 85  | 116 |
| SC0720003 | 46  | 1  | 3   | 7   |
| TN0000107 | 132 | 2  | 13  | 38  |
| TN0000116 | 62  | 5  | 14  | 20  |
| TN0000286 | 54  | 5  | 12  | 22  |
| TN0000366 | 60  | 11 | 20  | 39  |
| TX0140005 | 16  | 4  | 7   | 10  |
| TX0700001 | 2   | 2  | 2   | 2   |

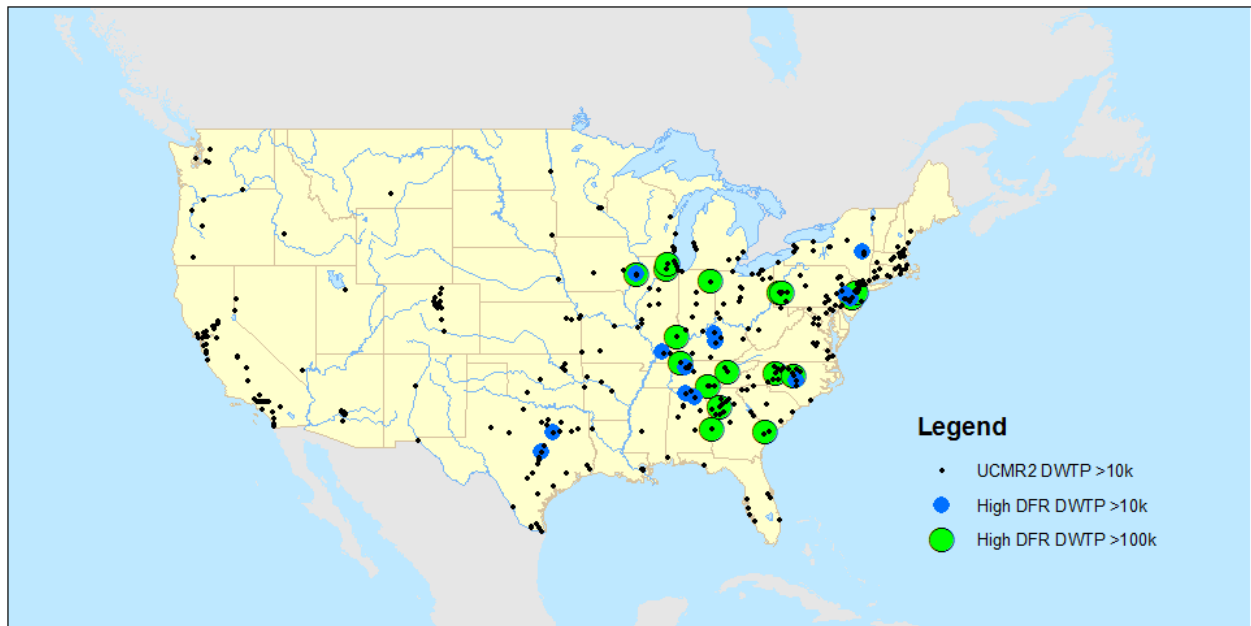

Figure S1. DWTP locations for plants serving >10k people in the UCMR2 (black dots), high DFR plants serving >10k people (small blue circles), and high DFR plants serving >100k (large green circles). Water features delineated in the USGS National Boundary Dataset. (Data from USGS 2014.)

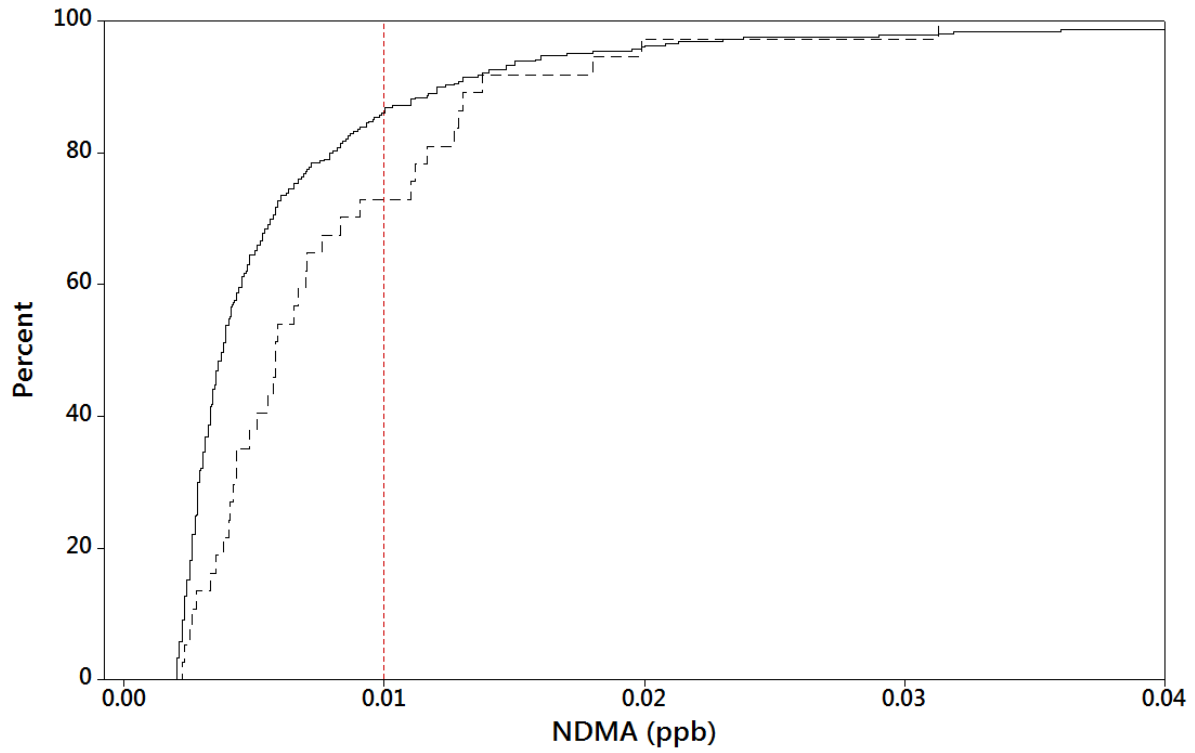

Figure S2. Empirical CDF of NDMA detections at the maximum residence time for chloraminating plants for the UCMR2 (solid) and high DFR subset (dashed). The vertical dashed line marks the California notification level of 10 ng/L



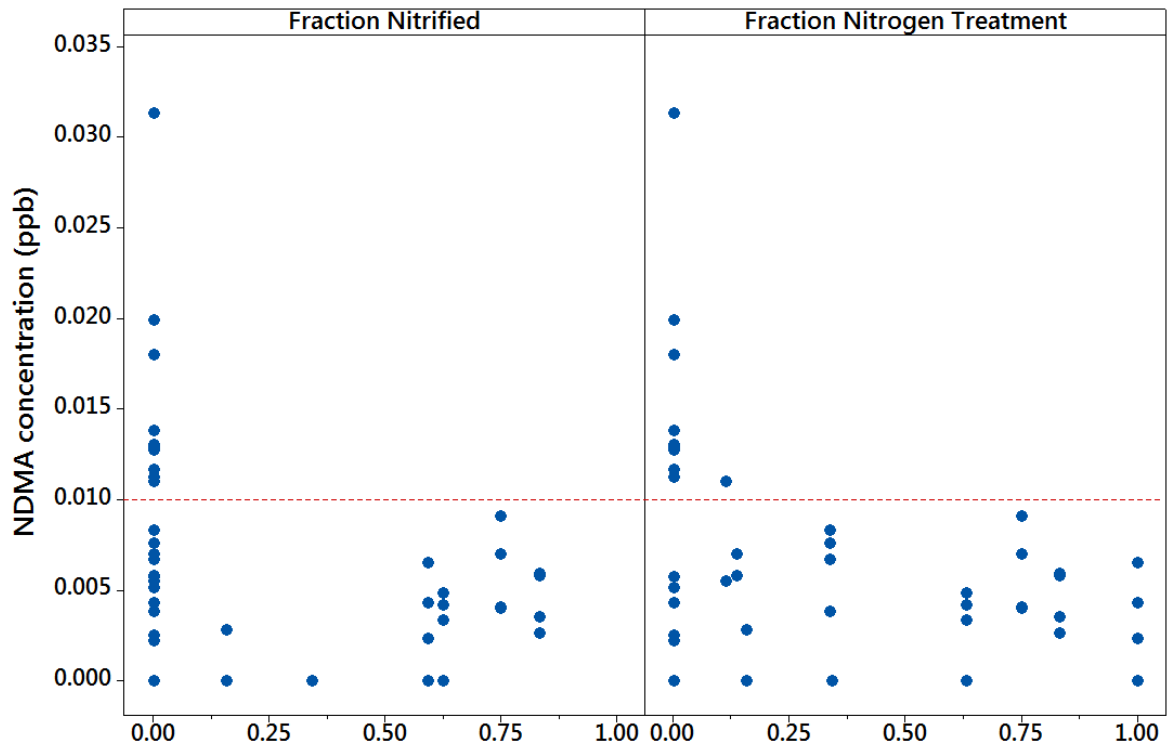

Figure S3. NDMA concentrations for chloraminating drinking water plants with upstream wastewater treatment facilities within 50 km, based on fraction of wastewater flows that are treated by nitrification (left) or include any nitrogen treatment (right). The horizontal red dashed line represents the California notification level of 10 ng/L.

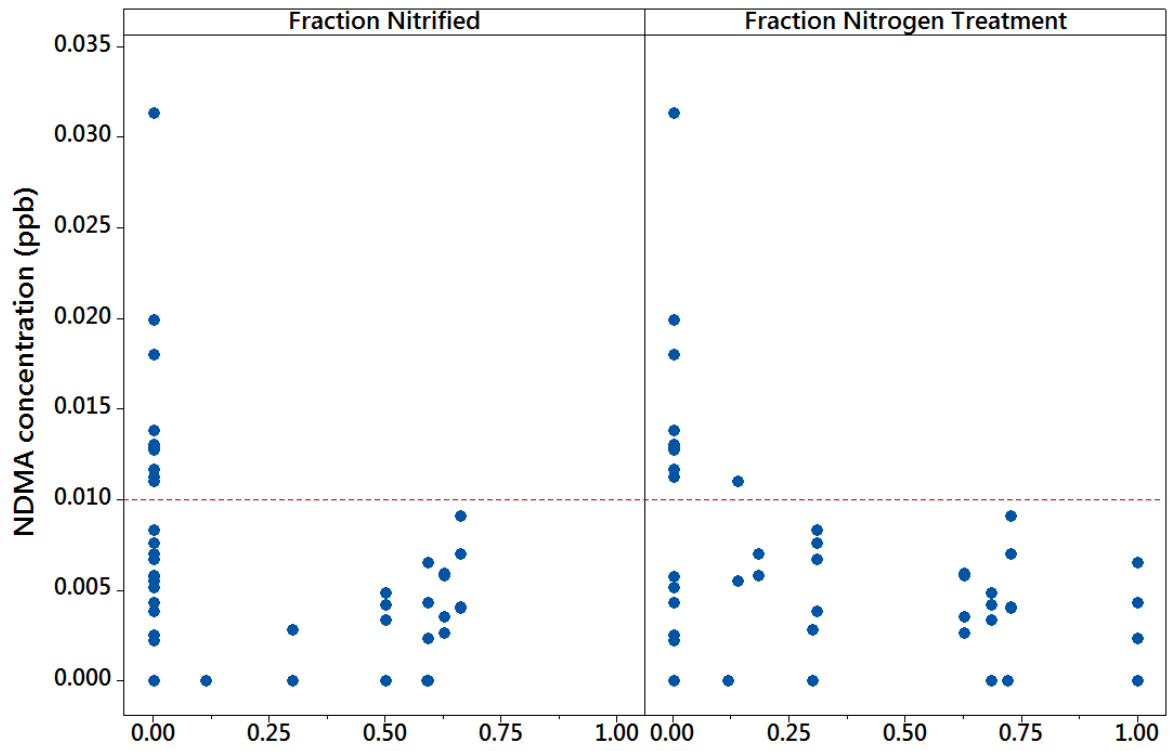

Figure S4. NDMA concentrations for chloraminating drinking water plants with upstream wastewater treatment facilities within 100 km, based on fraction of wastewater flows that are treated by nitrification (left) or include any nitrogen treatment (right). The horizontal red dashed line represents the California notification level of 10 ng/L.

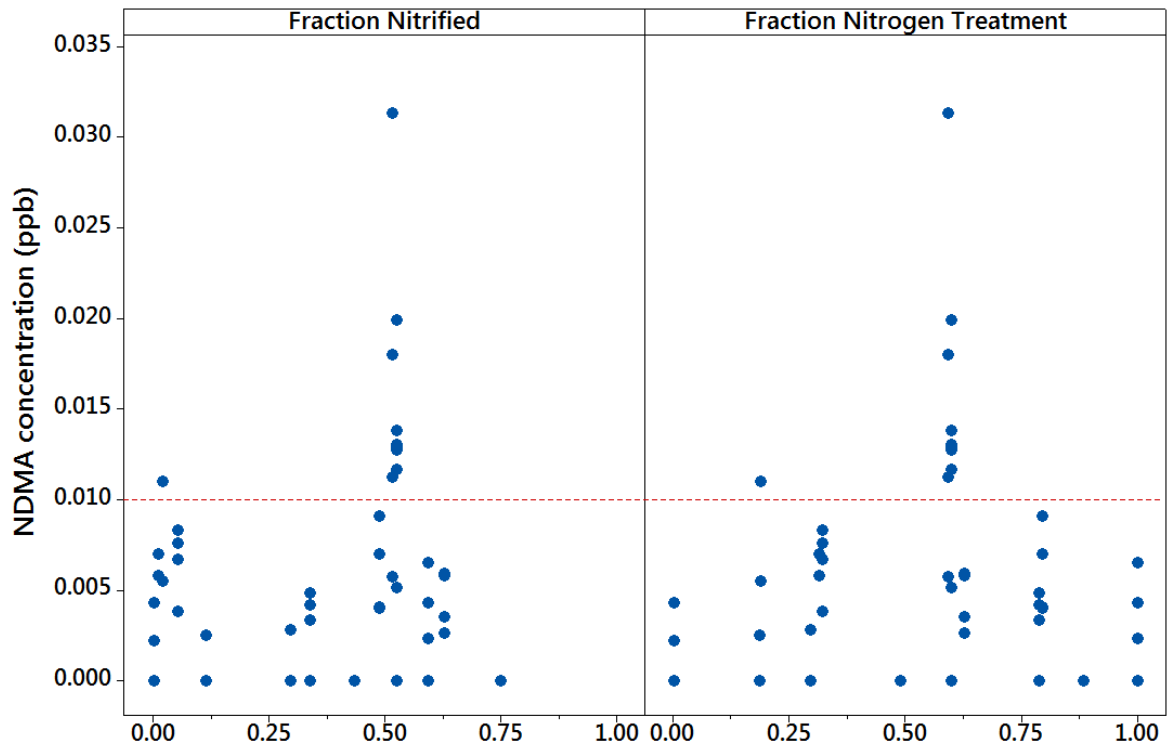

Figure S5. NDMA concentrations for chloraminating drinking water plants with upstream wastewater treatment facilities, based on fraction of wastewater flows that are treated by nitrification (left) or include any nitrogen treatment (right). The horizontal red dashed line represents the California notification level of 10 ng/L.

## References

USGS (2014) United States Geological Survey, “The National Boundary Dataset Downloadable Data Collection.” Accessed March 2018. <https://data.usgs.gov/datacatalog/data/USGS:6dcde538-1684-48a0-a8d6-cb671ca0a43e>
